# Supplementary material
Source: ML conference proceedings conference paper supplement (https://www.ecva.net/papers/eccv_2020/papers_ECCV/html/123460562_ECCV_2020_paper.php)
Supplement: Supplementary file 1 [file 123460562-supp.zip]

Archive with 118 entries (112 files):
- 2263-supp/
- __MACOSX/._2263-supp
- 2263-supp/Du2Net_supplementary.pdf
- __MACOSX/2263-supp/._Du2Net_supplementary.pdf
- 2263-supp/.DS_Store
- __MACOSX/2263-supp/._.DS_Store
- 2263-supp/readme_files/
- __MACOSX/2263-supp/._readme_files
- 2263-supp/readme.html
- __MACOSX/2263-supp/._readme.html
- 2263-supp/readme_files/left_camera/
- __MACOSX/2263-supp/readme_files/._left_camera
- 2263-supp/readme_files/.DS_Store
- __MACOSX/2263-supp/readme_files/._.DS_Store
- 2263-supp/readme_files/right_camera_top_dp_view/
- __MACOSX/2263-supp/readme_files/._right_camera_top_dp_view
- 2263-supp/readme_files/Du2Net.mp4
- __MACOSX/2263-supp/readme_files/._Du2Net.mp4
- 2263-supp/readme_files/right_camera/
- __MACOSX/2263-supp/readme_files/._right_camera
- 2263-supp/readme_files/right_camera_bottom_dp_view/
- __MACOSX/2263-supp/readme_files/._right_camera_bottom_dp_view
- 2263-supp/readme_files/left_camera/example_09.jpg
- __MACOSX/2263-supp/readme_files/left_camera/._example_09.jpg
- 2263-supp/readme_files/left_camera/example_08.jpg
- __MACOSX/2263-supp/readme_files/left_camera/._example_08.jpg
- 2263-supp/readme_files/left_camera/example_03.jpg
- __MACOSX/2263-supp/readme_files/left_camera/._example_03.jpg
- 2263-supp/readme_files/left_camera/example_02.jpg
- __MACOSX/2263-supp/readme_files/left_camera/._example_02.jpg
- 2263-supp/readme_files/left_camera/example_00.jpg
- __MACOSX/2263-supp/readme_files/left_camera/._example_00.jpg
- 2263-supp/readme_files/left_camera/example_01.jpg
- __MACOSX/2263-supp/readme_files/left_camera/._example_01.jpg
- 2263-supp/readme_files/left_camera/example_05.jpg
- __MACOSX/2263-supp/readme_files/left_camera/._example_05.jpg
- 2263-supp/readme_files/left_camera/example_11.jpg
- __MACOSX/2263-supp/readme_files/left_camera/._example_11.jpg
- 2263-supp/readme_files/left_camera/example_10.jpg
- __MACOSX/2263-supp/readme_files/left_camera/._example_10.jpg
- 2263-supp/readme_files/left_camera/example_04.jpg
- __MACOSX/2263-supp/readme_files/left_camera/._example_04.jpg
- 2263-supp/readme_files/left_camera/example_06.jpg
- __MACOSX/2263-supp/readme_files/left_camera/._example_06.jpg
- 2263-supp/readme_files/left_camera/example_07.jpg
- __MACOSX/2263-supp/readme_files/left_camera/._example_07.jpg
- 2263-supp/readme_files/right_camera_top_dp_view/example_09.jpg
- __MACOSX/2263-supp/readme_files/right_camera_top_dp_view/._example_09.jpg
- 2263-supp/readme_files/right_camera_top_dp_view/example_08.jpg
- __MACOSX/2263-supp/readme_files/right_camera_top_dp_view/._example_08.jpg
- 2263-supp/readme_files/right_camera_top_dp_view/example_03.jpg
- __MACOSX/2263-supp/readme_files/right_camera_top_dp_view/._example_03.jpg
- 2263-supp/readme_files/right_camera_top_dp_view/example_02.jpg
- __MACOSX/2263-supp/readme_files/right_camera_top_dp_view/._example_02.jpg
- 2263-supp/readme_files/right_camera_top_dp_view/example_00.jpg
- __MACOSX/2263-supp/readme_files/right_camera_top_dp_view/._example_00.jpg
- 2263-supp/readme_files/right_camera_top_dp_view/example_01.jpg
- __MACOSX/2263-supp/readme_files/right_camera_top_dp_view/._example_01.jpg
- 2263-supp/readme_files/right_camera_top_dp_view/example_05.jpg
- __MACOSX/2263-supp/readme_files/right_camera_top_dp_view/._example_05.jpg
- 2263-supp/readme_files/right_camera_top_dp_view/example_11.jpg
- __MACOSX/2263-supp/readme_files/right_camera_top_dp_view/._example_11.jpg
- 2263-supp/readme_files/right_camera_top_dp_view/example_10.jpg
- __MACOSX/2263-supp/readme_files/right_camera_top_dp_view/._example_10.jpg
- 2263-supp/readme_files/right_camera_top_dp_view/example_04.jpg
- __MACOSX/2263-supp/readme_files/right_camera_top_dp_view/._example_04.jpg
- 2263-supp/readme_files/right_camera_top_dp_view/example_06.jpg
- __MACOSX/2263-supp/readme_files/right_camera_top_dp_view/._example_06.jpg
- 2263-supp/readme_files/right_camera_top_dp_view/example_07.jpg
- __MACOSX/2263-supp/readme_files/right_camera_top_dp_view/._example_07.jpg
- 2263-supp/readme_files/right_camera/example_09.jpg
- __MACOSX/2263-supp/readme_files/right_camera/._example_09.jpg
- 2263-supp/readme_files/right_camera/example_08.jpg
- __MACOSX/2263-supp/readme_files/right_camera/._example_08.jpg
- 2263-supp/readme_files/right_camera/example_03.jpg
- __MACOSX/2263-supp/readme_files/right_camera/._example_03.jpg
- 2263-supp/readme_files/right_camera/example_02.jpg
- __MACOSX/2263-supp/readme_files/right_camera/._example_02.jpg
- 2263-supp/readme_files/right_camera/example_00.jpg
- __MACOSX/2263-supp/readme_files/right_camera/._example_00.jpg
- 2263-supp/readme_files/right_camera/example_01.jpg
- __MACOSX/2263-supp/readme_files/right_camera/._example_01.jpg
- 2263-supp/readme_files/right_camera/example_05.jpg
- __MACOSX/2263-supp/readme_files/right_camera/._example_05.jpg
- 2263-supp/readme_files/right_camera/example_11.jpg
- __MACOSX/2263-supp/readme_files/right_camera/._example_11.jpg
- 2263-supp/readme_files/right_camera/example_10.jpg
- __MACOSX/2263-supp/readme_files/right_camera/._example_10.jpg
- 2263-supp/readme_files/right_camera/example_04.jpg
- __MACOSX/2263-supp/readme_files/right_camera/._example_04.jpg
- 2263-supp/readme_files/right_camera/example_06.jpg
- __MACOSX/2263-supp/readme_files/right_camera/._example_06.jpg
- 2263-supp/readme_files/right_camera/example_07.jpg
- __MACOSX/2263-supp/readme_files/right_camera/._example_07.jpg
- 2263-supp/readme_files/right_camera_bottom_dp_view/example_09.jpg
- __MACOSX/2263-supp/readme_files/right_camera_bottom_dp_view/._example_09.jpg
- 2263-supp/readme_files/right_camera_bottom_dp_view/example_08.jpg
- __MACOSX/2263-supp/readme_files/right_camera_bottom_dp_view/._example_08.jpg
- 2263-supp/readme_files/right_camera_bottom_dp_view/example_03.jpg
- __MACOSX/2263-supp/readme_files/right_camera_bottom_dp_view/._example_03.jpg
- 2263-supp/readme_files/right_camera_bottom_dp_view/example_02.jpg
- __MACOSX/2263-supp/readme_files/right_camera_bottom_dp_view/._example_02.jpg
- 2263-supp/readme_files/right_camera_bottom_dp_view/example_00.jpg
- __MACOSX/2263-supp/readme_files/right_camera_bottom_dp_view/._example_00.jpg
- 2263-supp/readme_files/right_camera_bottom_dp_view/example_01.jpg
- __MACOSX/2263-supp/readme_files/right_camera_bottom_dp_view/._example_01.jpg
- 2263-supp/readme_files/right_camera_bottom_dp_view/example_05.jpg
- __MACOSX/2263-supp/readme_files/right_camera_bottom_dp_view/._example_05.jpg
- 2263-supp/readme_files/right_camera_bottom_dp_view/example_11.jpg
- __MACOSX/2263-supp/readme_files/right_camera_bottom_dp_view/._example_11.jpg
- 2263-supp/readme_files/right_camera_bottom_dp_view/example_10.jpg
- __MACOSX/2263-supp/readme_files/right_camera_bottom_dp_view/._example_10.jpg
- 2263-supp/readme_files/right_camera_bottom_dp_view/example_04.jpg
- __MACOSX/2263-supp/readme_files/right_camera_bottom_dp_view/._example_04.jpg
- 2263-supp/readme_files/right_camera_bottom_dp_view/example_06.jpg
- __MACOSX/2263-supp/readme_files/right_camera_bottom_dp_view/._example_06.jpg
- 2263-supp/readme_files/right_camera_bottom_dp_view/example_07.jpg
- __MACOSX/2263-supp/readme_files/right_camera_bottom_dp_view/._example_07.jpg
