# Supplementary material
Source: ML conference proceedings conference paper supplement (https://www.ecva.net/papers/eccv_2020/papers_ECCV/html/123460562_ECCV_2020_paper.php)
Supplement: Supplementary file 1 [file 123460562-supp.zip › 2263-supp/readme.html]

Supplemental Material for Du2Net: Learning Depth Estimation from Dual-Cameras and Dual-Pixels


Supplemental Webpage for Du2Net: Learning Depth Estimation from Dual-Cameras and Dual-Pixels

# 3D Photos Results

[

Your browser does not support mp4 videos. Please use VLC (https://www.videolan.org/vlc/index.html) to play the supplemental video.
](readme_files/Du2Net.mp4)

# Example Stereo and DP Data

### You can click on stereo or DP images to see the other view. Please zoom into to see the difference between the DP views.

|  |  |  |  |
| --- | --- | --- | --- |
| right\_camera  (Click the image to see left\_camera) | left\_camera  (Click the image to see right\_camera) | right\_camera\_top\_dp\_view  (Click the image to see right\_camera\_bottom\_dp\_view) | right\_camera\_bottom\_dp\_view  (Click the image to see right\_camera\_top\_dp\_view) |
 example\_00 | example\_00 | example\_00 | example\_00 || right\_camera  (Click the image to see left\_camera) | left\_camera  (Click the image to see right\_camera) | right\_camera\_top\_dp\_view  (Click the image to see right\_camera\_bottom\_dp\_view) | right\_camera\_bottom\_dp\_view  (Click the image to see right\_camera\_top\_dp\_view) |
 example\_01 | example\_01 | example\_01 | example\_01 || right\_camera  (Click the image to see left\_camera) | left\_camera  (Click the image to see right\_camera) | right\_camera\_top\_dp\_view  (Click the image to see right\_camera\_bottom\_dp\_view) | right\_camera\_bottom\_dp\_view  (Click the image to see right\_camera\_top\_dp\_view) |
 example\_02 | example\_02 | example\_02 | example\_02 || right\_camera  (Click the image to see left\_camera) | left\_camera  (Click the image to see right\_camera) | right\_camera\_top\_dp\_view  (Click the image to see right\_camera\_bottom\_dp\_view) | right\_camera\_bottom\_dp\_view  (Click the image to see right\_camera\_top\_dp\_view) |
 example\_03 | example\_03 | example\_03 | example\_03 || right\_camera  (Click the image to see left\_camera) | left\_camera  (Click the image to see right\_camera) | right\_camera\_top\_dp\_view  (Click the image to see right\_camera\_bottom\_dp\_view) | right\_camera\_bottom\_dp\_view  (Click the image to see right\_camera\_top\_dp\_view) |
 example\_04 | example\_04 | example\_04 | example\_04 || right\_camera  (Click the image to see left\_camera) | left\_camera  (Click the image to see right\_camera) | right\_camera\_top\_dp\_view  (Click the image to see right\_camera\_bottom\_dp\_view) | right\_camera\_bottom\_dp\_view  (Click the image to see right\_camera\_top\_dp\_view) |
 example\_05 | example\_05 | example\_05 | example\_05 || right\_camera  (Click the image to see left\_camera) | left\_camera  (Click the image to see right\_camera) | right\_camera\_top\_dp\_view  (Click the image to see right\_camera\_bottom\_dp\_view) | right\_camera\_bottom\_dp\_view  (Click the image to see right\_camera\_top\_dp\_view) |
 example\_06 | example\_06 | example\_06 | example\_06 || right\_camera  (Click the image to see left\_camera) | left\_camera  (Click the image to see right\_camera) | right\_camera\_top\_dp\_view  (Click the image to see right\_camera\_bottom\_dp\_view) | right\_camera\_bottom\_dp\_view  (Click the image to see right\_camera\_top\_dp\_view) |
 example\_07 | example\_07 | example\_07 | example\_07 || right\_camera  (Click the image to see left\_camera) | left\_camera  (Click the image to see right\_camera) | right\_camera\_top\_dp\_view  (Click the image to see right\_camera\_bottom\_dp\_view) | right\_camera\_bottom\_dp\_view  (Click the image to see right\_camera\_top\_dp\_view) |
 example\_08 | example\_08 | example\_08 | example\_08 || right\_camera  (Click the image to see left\_camera) | left\_camera  (Click the image to see right\_camera) | right\_camera\_top\_dp\_view  (Click the image to see right\_camera\_bottom\_dp\_view) | right\_camera\_bottom\_dp\_view  (Click the image to see right\_camera\_top\_dp\_view) |
 example\_09 | example\_09 | example\_09 | example\_09 || right\_camera  (Click the image to see left\_camera) | left\_camera  (Click the image to see right\_camera) | right\_camera\_top\_dp\_view  (Click the image to see right\_camera\_bottom\_dp\_view) | right\_camera\_bottom\_dp\_view  (Click the image to see right\_camera\_top\_dp\_view) |
 example\_10 | example\_10 | example\_10 | example\_10 || right\_camera  (Click the image to see left\_camera) | left\_camera  (Click the image to see right\_camera) | right\_camera\_top\_dp\_view  (Click the image to see right\_camera\_bottom\_dp\_view) | right\_camera\_bottom\_dp\_view  (Click the image to see right\_camera\_top\_dp\_view) |
 example\_11 | example\_11 | example\_11 | example\_11 |
