# Supplementary material
Source: ML conference proceedings conference paper supplement (https://www.ecva.net/papers/eccv_2020/papers_ECCV/html/123460562_ECCV_2020_paper.php)

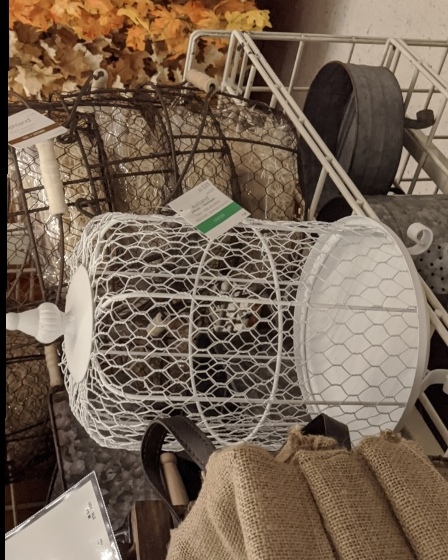

Supplement: Supplementary file 1 [file 123460562-supp.zip › 2263-supp/readme_files/left_camera/example_09.jpg]

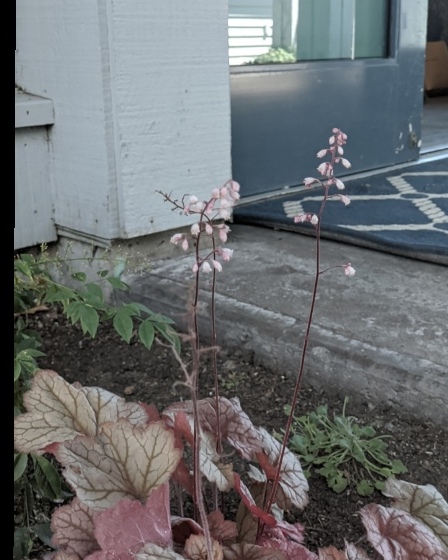

Supplement: Supplementary file 1 [file 123460562-supp.zip › 2263-supp/readme_files/left_camera/example_08.jpg]

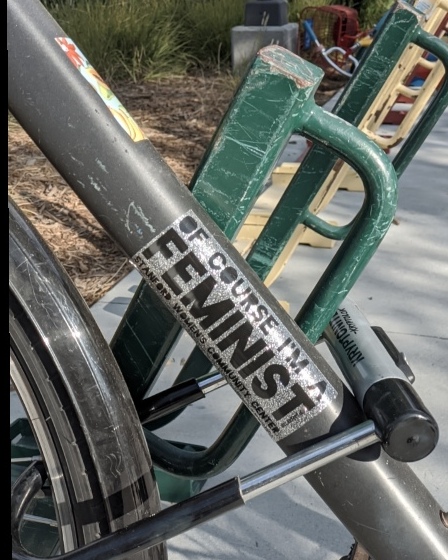

Supplement: Supplementary file 1 [file 123460562-supp.zip › 2263-supp/readme_files/left_camera/example_03.jpg]

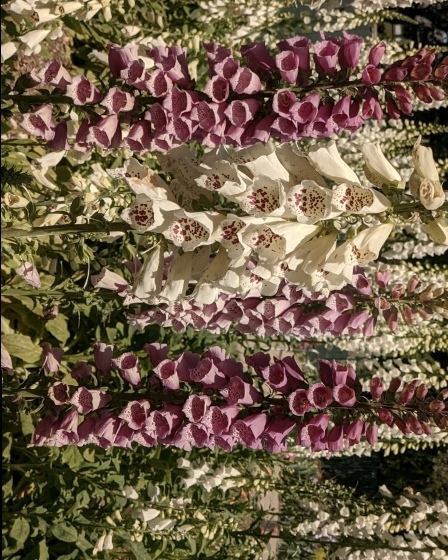

Supplement: Supplementary file 1 [file 123460562-supp.zip › 2263-supp/readme_files/left_camera/example_02.jpg]

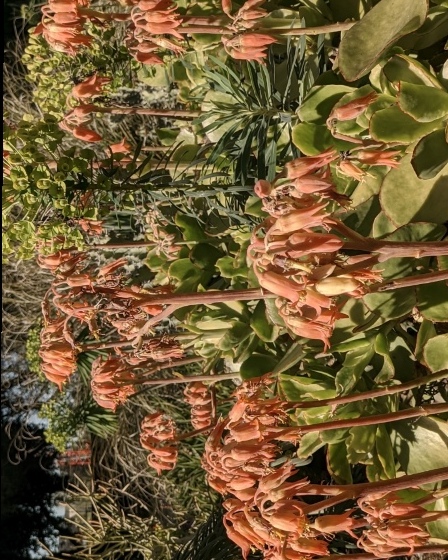

Supplement: Supplementary file 1 [file 123460562-supp.zip › 2263-supp/readme_files/left_camera/example_00.jpg]

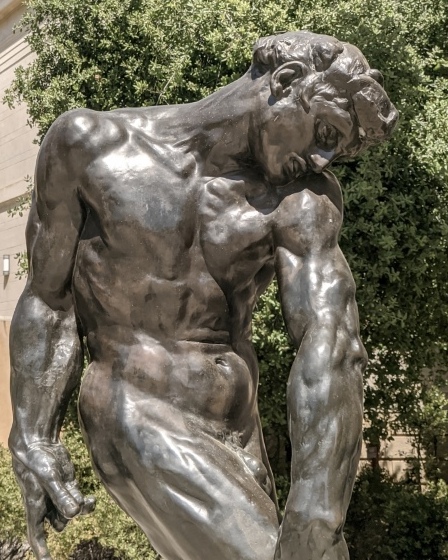

Supplement: Supplementary file 1 [file 123460562-supp.zip › 2263-supp/readme_files/left_camera/example_01.jpg]

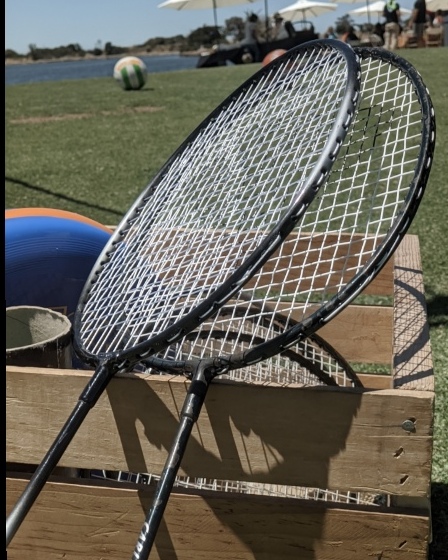

Supplement: Supplementary file 1 [file 123460562-supp.zip › 2263-supp/readme_files/left_camera/example_05.jpg]

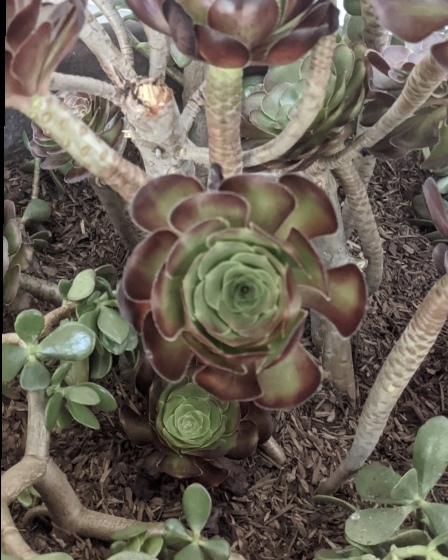

Supplement: Supplementary file 1 [file 123460562-supp.zip › 2263-supp/readme_files/left_camera/example_11.jpg]

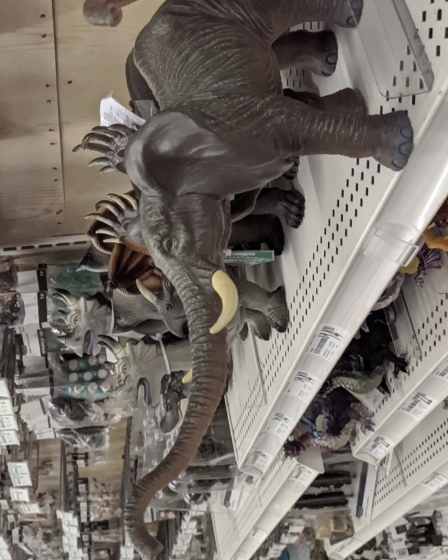

Supplement: Supplementary file 1 [file 123460562-supp.zip › 2263-supp/readme_files/left_camera/example_10.jpg]

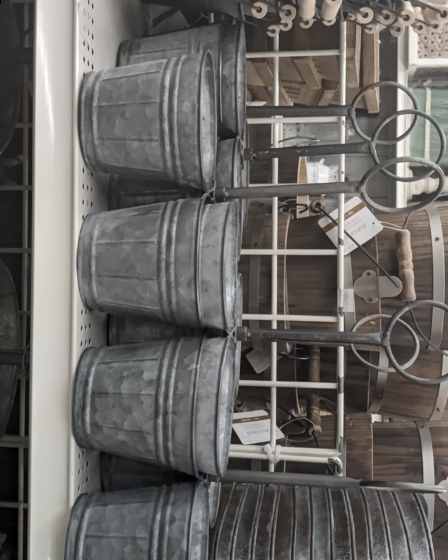

Supplement: Supplementary file 1 [file 123460562-supp.zip › 2263-supp/readme_files/left_camera/example_04.jpg]

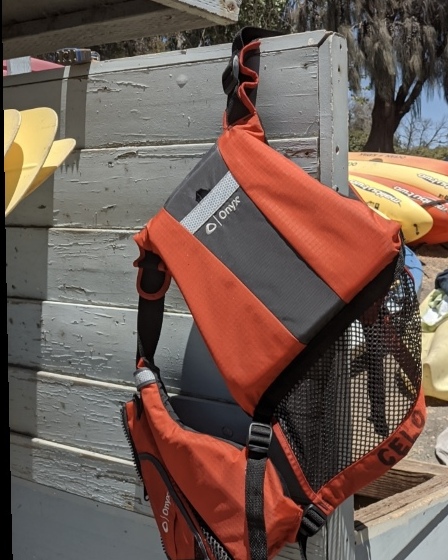

Supplement: Supplementary file 1 [file 123460562-supp.zip › 2263-supp/readme_files/left_camera/example_06.jpg]

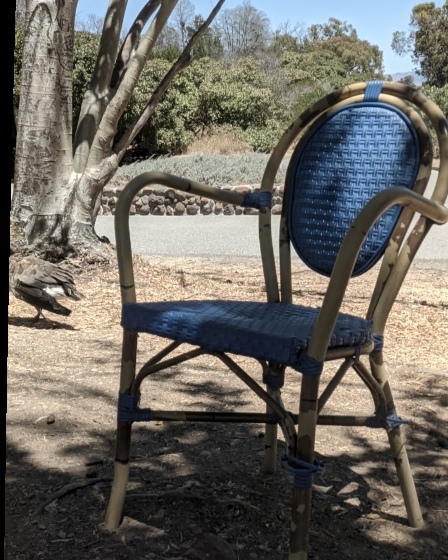

Supplement: Supplementary file 1 [file 123460562-supp.zip › 2263-supp/readme_files/left_camera/example_07.jpg]

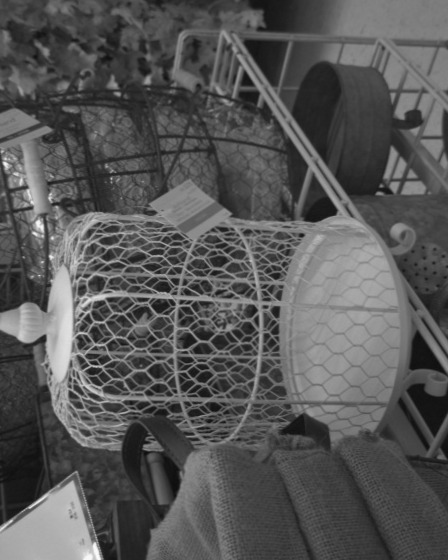

Supplement: Supplementary file 1 [file 123460562-supp.zip › 2263-supp/readme_files/right_camera_top_dp_view/example_09.jpg]

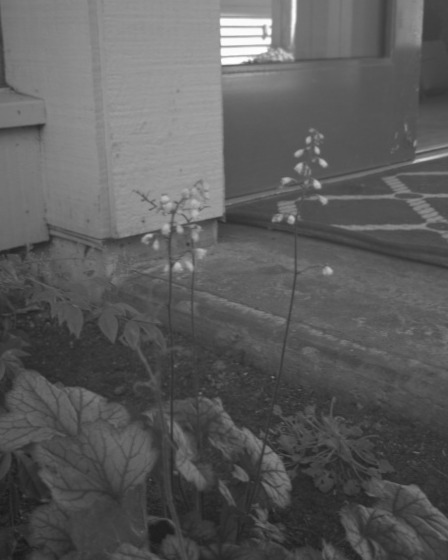

Supplement: Supplementary file 1 [file 123460562-supp.zip › 2263-supp/readme_files/right_camera_top_dp_view/example_08.jpg]

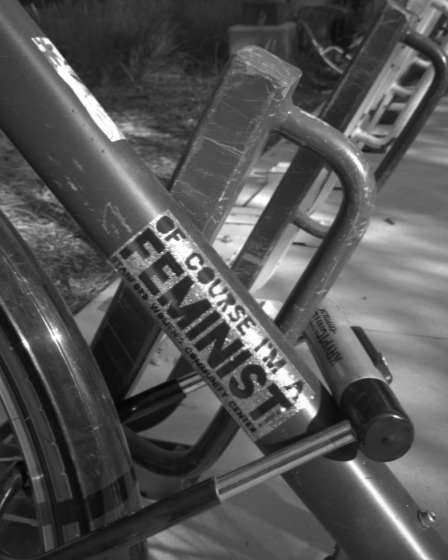

Supplement: Supplementary file 1 [file 123460562-supp.zip › 2263-supp/readme_files/right_camera_top_dp_view/example_03.jpg]

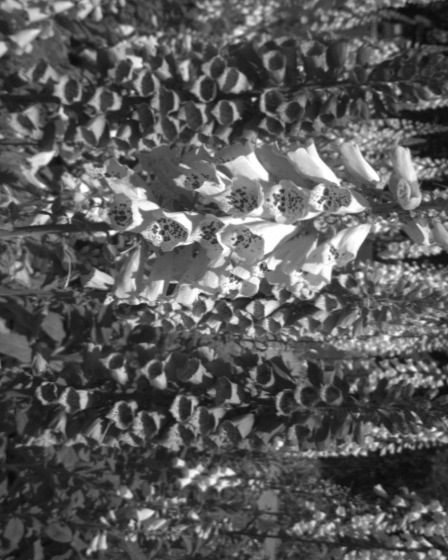

Supplement: Supplementary file 1 [file 123460562-supp.zip › 2263-supp/readme_files/right_camera_top_dp_view/example_02.jpg]

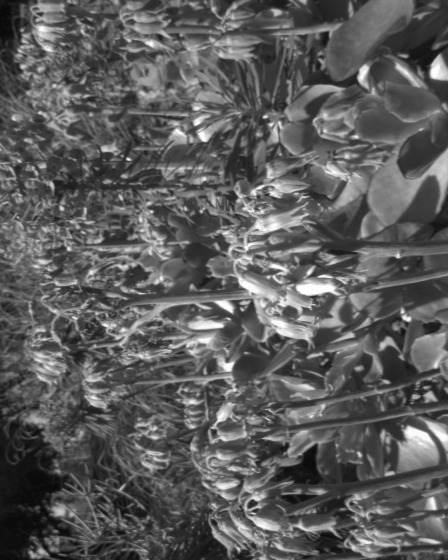

Supplement: Supplementary file 1 [file 123460562-supp.zip › 2263-supp/readme_files/right_camera_top_dp_view/example_00.jpg]

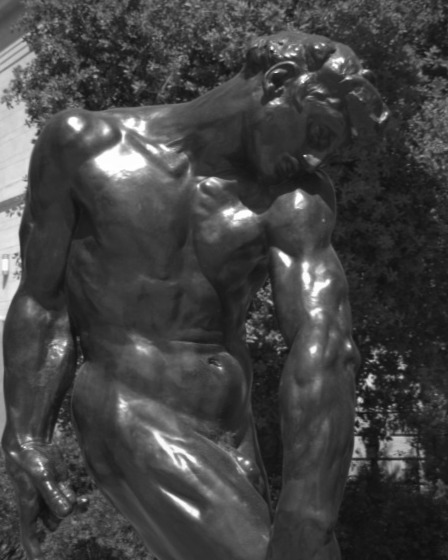

Supplement: Supplementary file 1 [file 123460562-supp.zip › 2263-supp/readme_files/right_camera_top_dp_view/example_01.jpg]

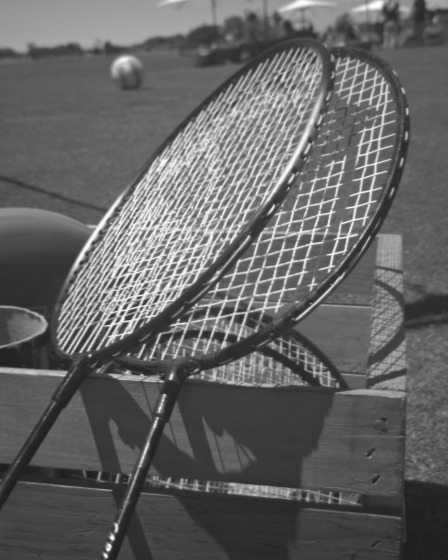

Supplement: Supplementary file 1 [file 123460562-supp.zip › 2263-supp/readme_files/right_camera_top_dp_view/example_05.jpg]

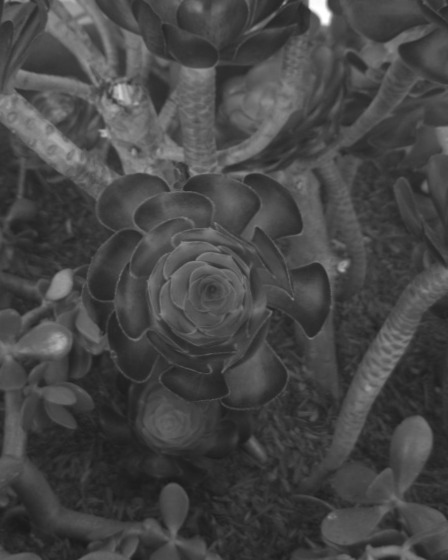

Supplement: Supplementary file 1 [file 123460562-supp.zip › 2263-supp/readme_files/right_camera_top_dp_view/example_11.jpg]

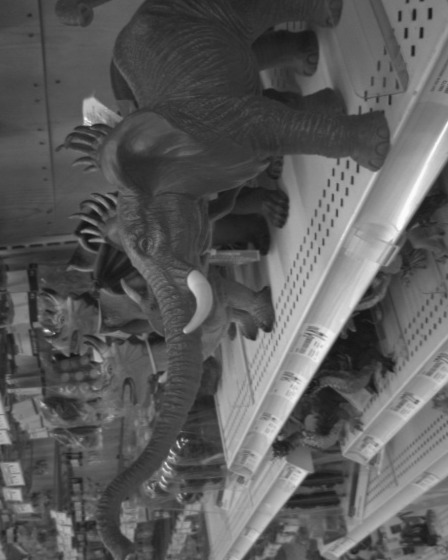

Supplement: Supplementary file 1 [file 123460562-supp.zip › 2263-supp/readme_files/right_camera_top_dp_view/example_10.jpg]

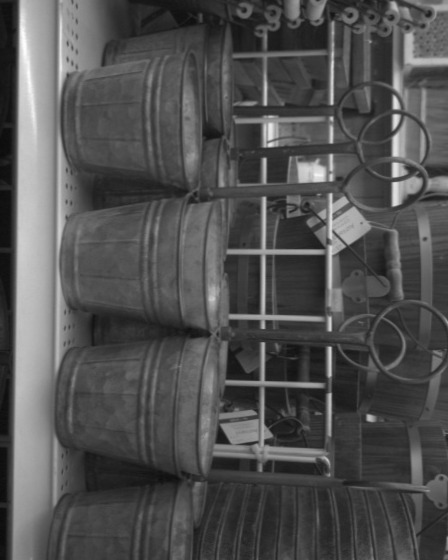

Supplement: Supplementary file 1 [file 123460562-supp.zip › 2263-supp/readme_files/right_camera_top_dp_view/example_04.jpg]

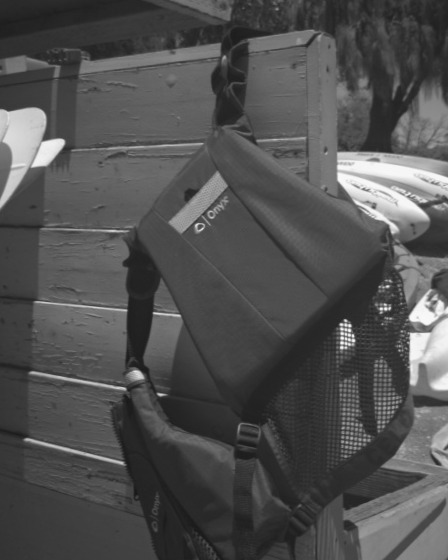

Supplement: Supplementary file 1 [file 123460562-supp.zip › 2263-supp/readme_files/right_camera_top_dp_view/example_06.jpg]

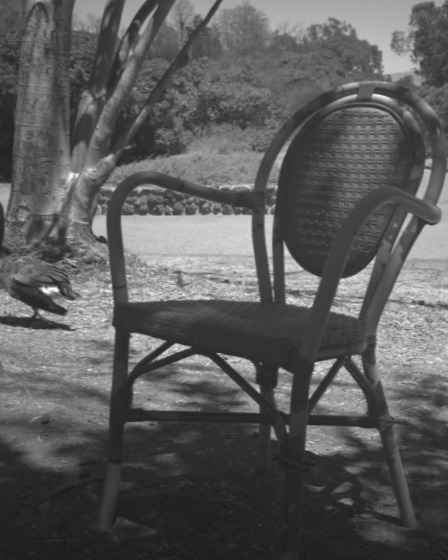

Supplement: Supplementary file 1 [file 123460562-supp.zip › 2263-supp/readme_files/right_camera_top_dp_view/example_07.jpg]

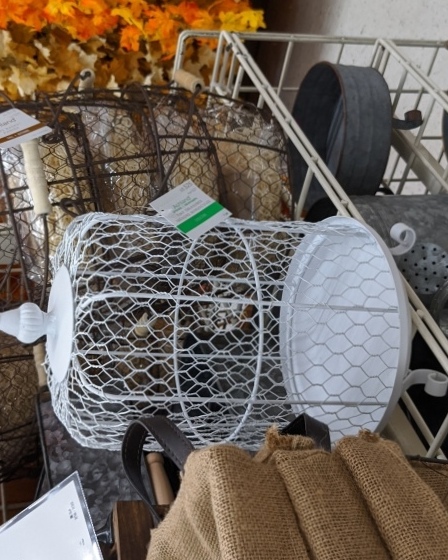

Supplement: Supplementary file 1 [file 123460562-supp.zip › 2263-supp/readme_files/right_camera/example_09.jpg]

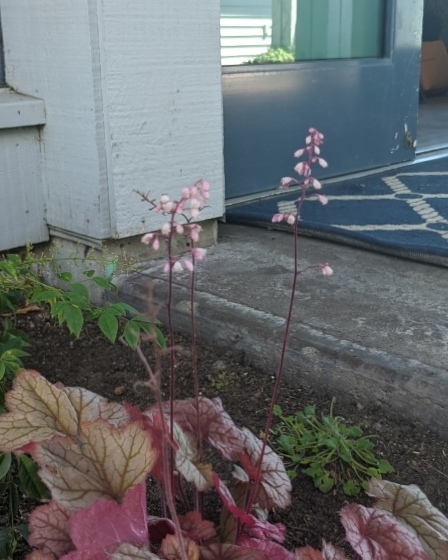

Supplement: Supplementary file 1 [file 123460562-supp.zip › 2263-supp/readme_files/right_camera/example_08.jpg]

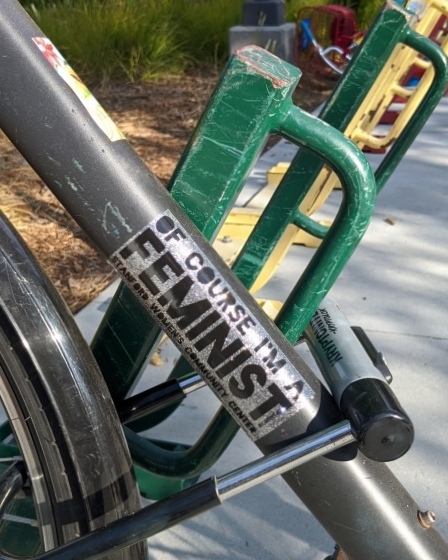

Supplement: Supplementary file 1 [file 123460562-supp.zip › 2263-supp/readme_files/right_camera/example_03.jpg]

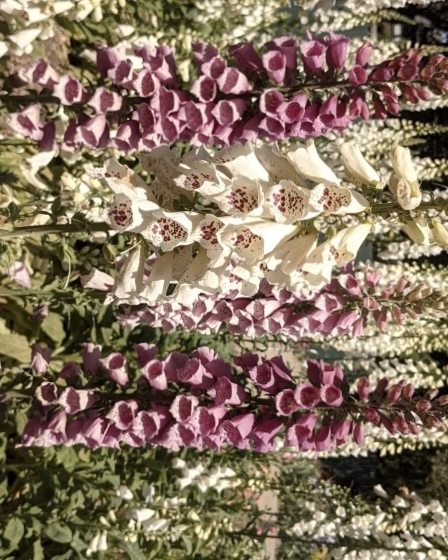

Supplement: Supplementary file 1 [file 123460562-supp.zip › 2263-supp/readme_files/right_camera/example_02.jpg]

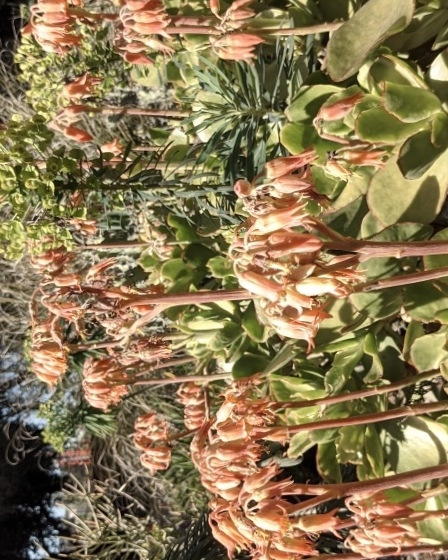

Supplement: Supplementary file 1 [file 123460562-supp.zip › 2263-supp/readme_files/right_camera/example_00.jpg]

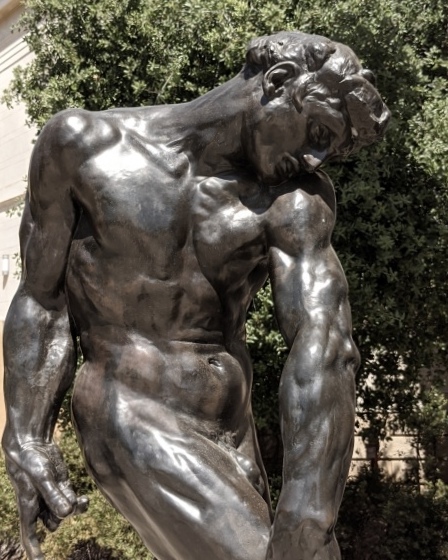

Supplement: Supplementary file 1 [file 123460562-supp.zip › 2263-supp/readme_files/right_camera/example_01.jpg]

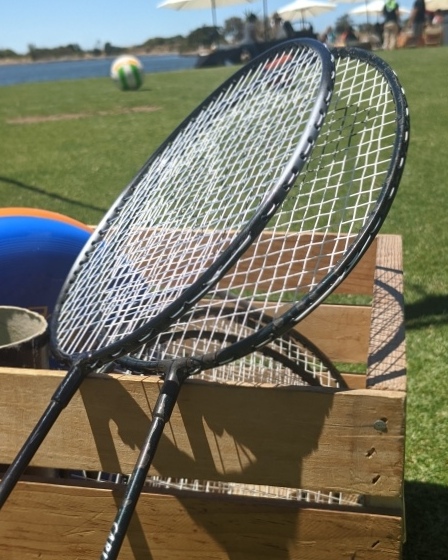

Supplement: Supplementary file 1 [file 123460562-supp.zip › 2263-supp/readme_files/right_camera/example_05.jpg]

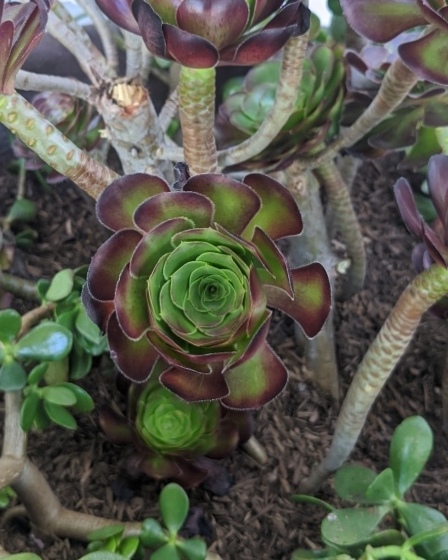

Supplement: Supplementary file 1 [file 123460562-supp.zip › 2263-supp/readme_files/right_camera/example_11.jpg]

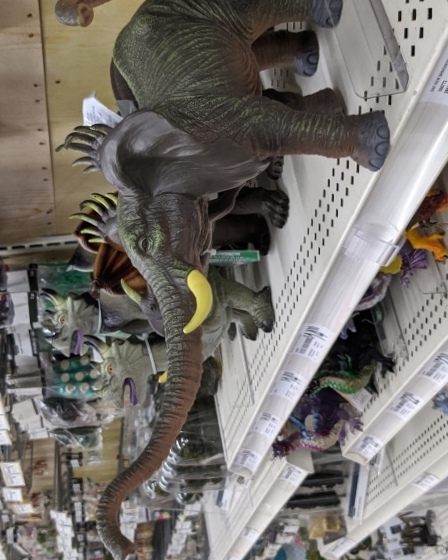

Supplement: Supplementary file 1 [file 123460562-supp.zip › 2263-supp/readme_files/right_camera/example_10.jpg]

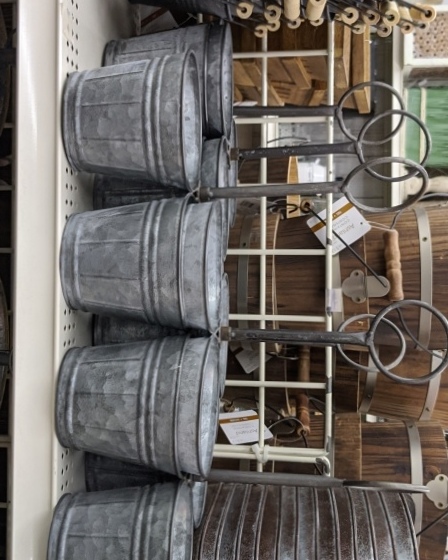

Supplement: Supplementary file 1 [file 123460562-supp.zip › 2263-supp/readme_files/right_camera/example_04.jpg]

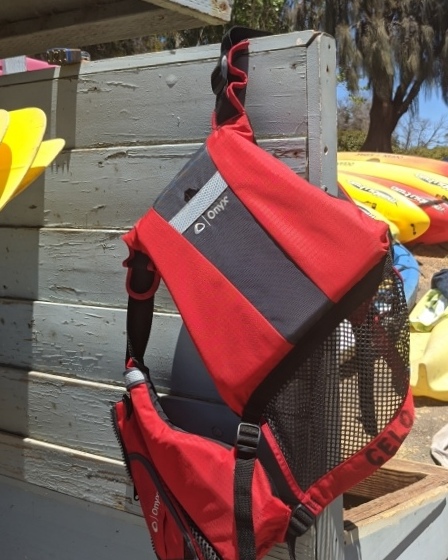

Supplement: Supplementary file 1 [file 123460562-supp.zip › 2263-supp/readme_files/right_camera/example_06.jpg]

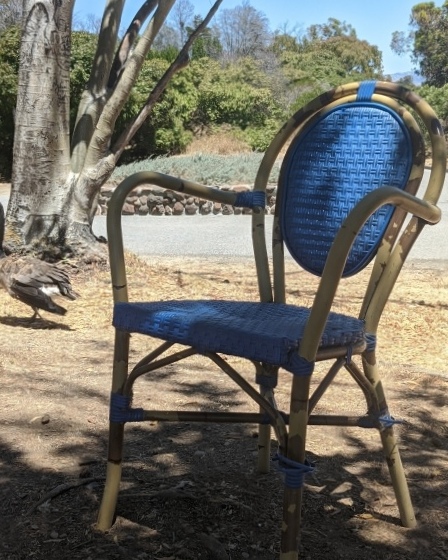

Supplement: Supplementary file 1 [file 123460562-supp.zip › 2263-supp/readme_files/right_camera/example_07.jpg]

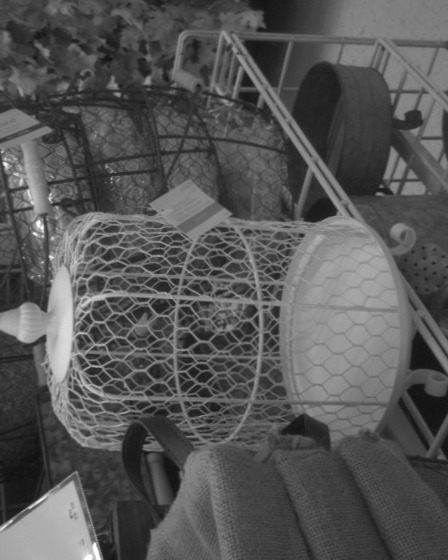

Supplement: Supplementary file 1 [file 123460562-supp.zip › 2263-supp/readme_files/right_camera_bottom_dp_view/example_09.jpg]

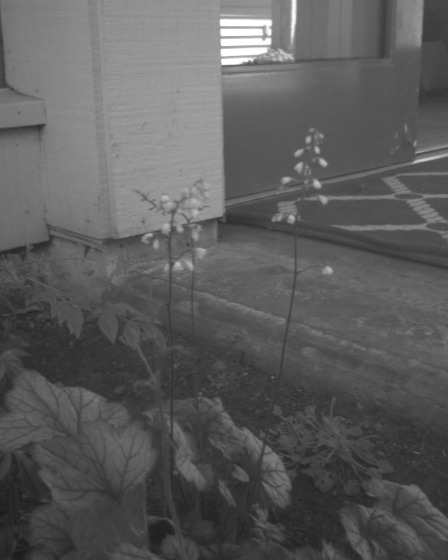

Supplement: Supplementary file 1 [file 123460562-supp.zip › 2263-supp/readme_files/right_camera_bottom_dp_view/example_08.jpg]

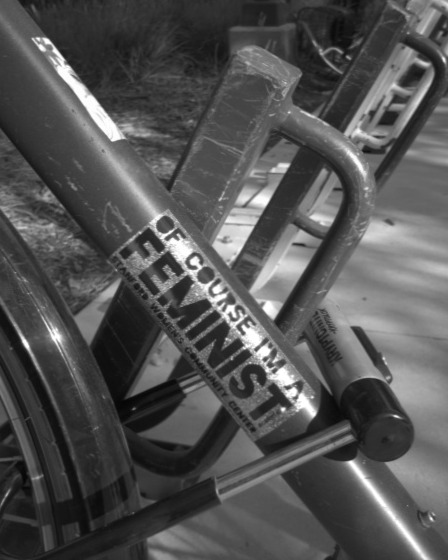

Supplement: Supplementary file 1 [file 123460562-supp.zip › 2263-supp/readme_files/right_camera_bottom_dp_view/example_03.jpg]

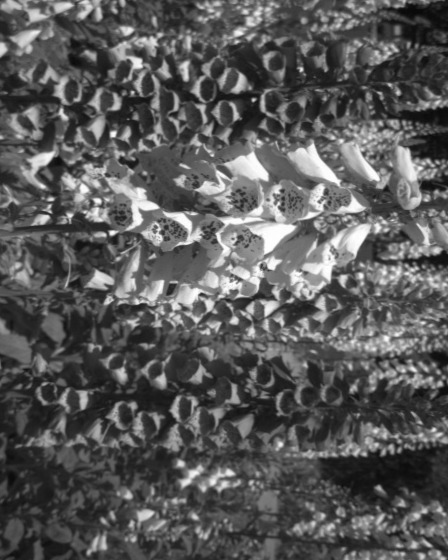

Supplement: Supplementary file 1 [file 123460562-supp.zip › 2263-supp/readme_files/right_camera_bottom_dp_view/example_02.jpg]

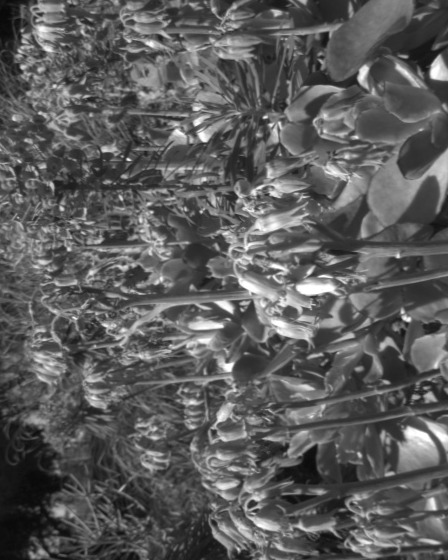

Supplement: Supplementary file 1 [file 123460562-supp.zip › 2263-supp/readme_files/right_camera_bottom_dp_view/example_00.jpg]

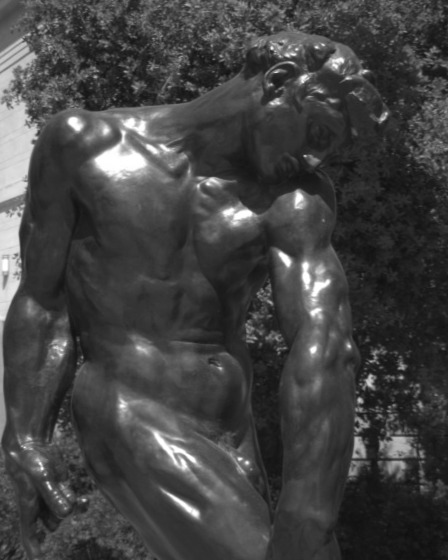

Supplement: Supplementary file 1 [file 123460562-supp.zip › 2263-supp/readme_files/right_camera_bottom_dp_view/example_01.jpg]

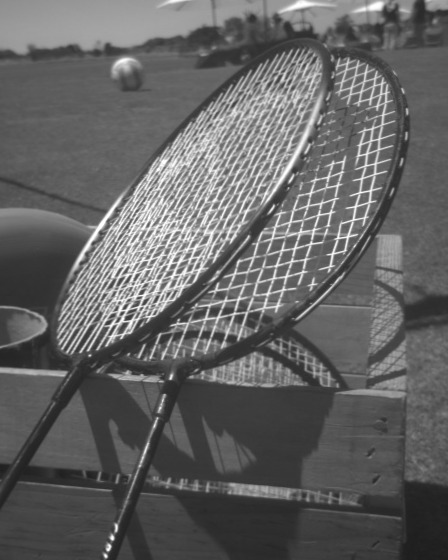

Supplement: Supplementary file 1 [file 123460562-supp.zip › 2263-supp/readme_files/right_camera_bottom_dp_view/example_05.jpg]

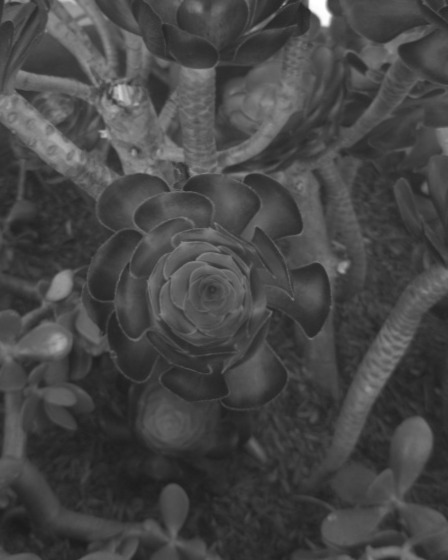

Supplement: Supplementary file 1 [file 123460562-supp.zip › 2263-supp/readme_files/right_camera_bottom_dp_view/example_11.jpg]

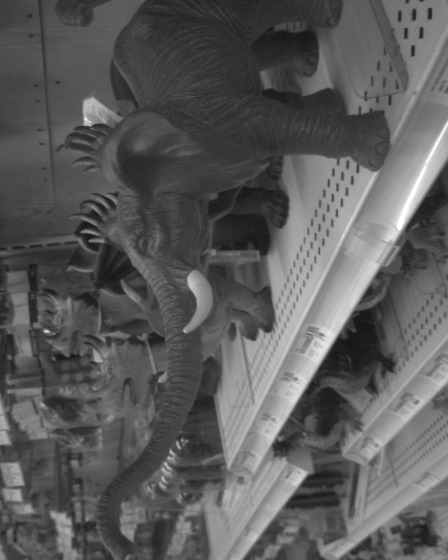

Supplement: Supplementary file 1 [file 123460562-supp.zip › 2263-supp/readme_files/right_camera_bottom_dp_view/example_10.jpg]

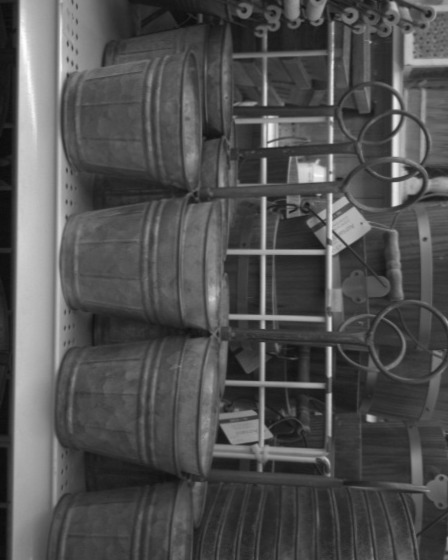

Supplement: Supplementary file 1 [file 123460562-supp.zip › 2263-supp/readme_files/right_camera_bottom_dp_view/example_04.jpg]

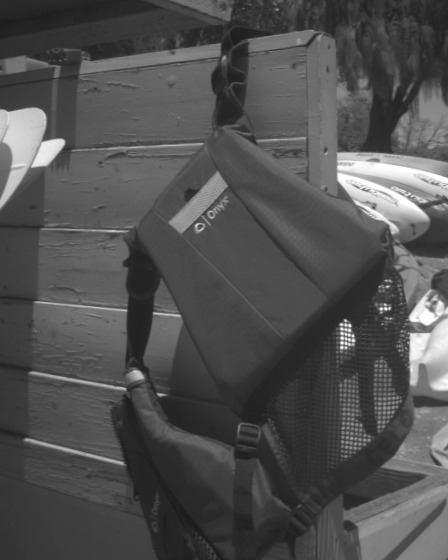

Supplement: Supplementary file 1 [file 123460562-supp.zip › 2263-supp/readme_files/right_camera_bottom_dp_view/example_06.jpg]

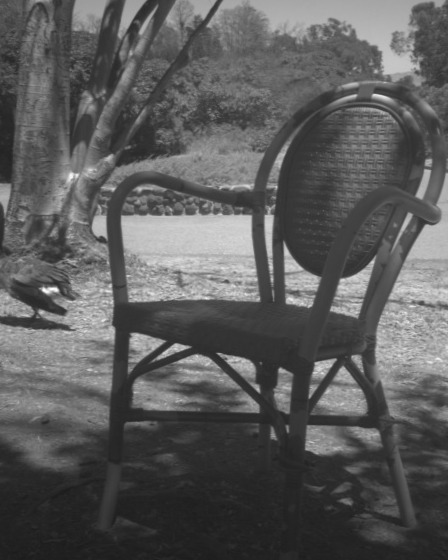

Supplement: Supplementary file 1 [file 123460562-supp.zip › 2263-supp/readme_files/right_camera_bottom_dp_view/example_07.jpg]
